# Supplementary material for: Direct determination of absolute configuration of carboxylic acids by cyclooctapyrrole
Source: Royal Society of Chemistry journal article supplement (doi:10.1039/b606228h), 2006-01-01

**Supplementary information 1.** UV-vis and CD titration spectral changes upon addition of (*R*)-(-)-mandelic acid ( $1.77 \times 10^{-2}$  M in MeOH) to **01** ( $5.91 \times 10^{-6}$  M in  $\text{CH}_2\text{Cl}_2$ ) at 293 K

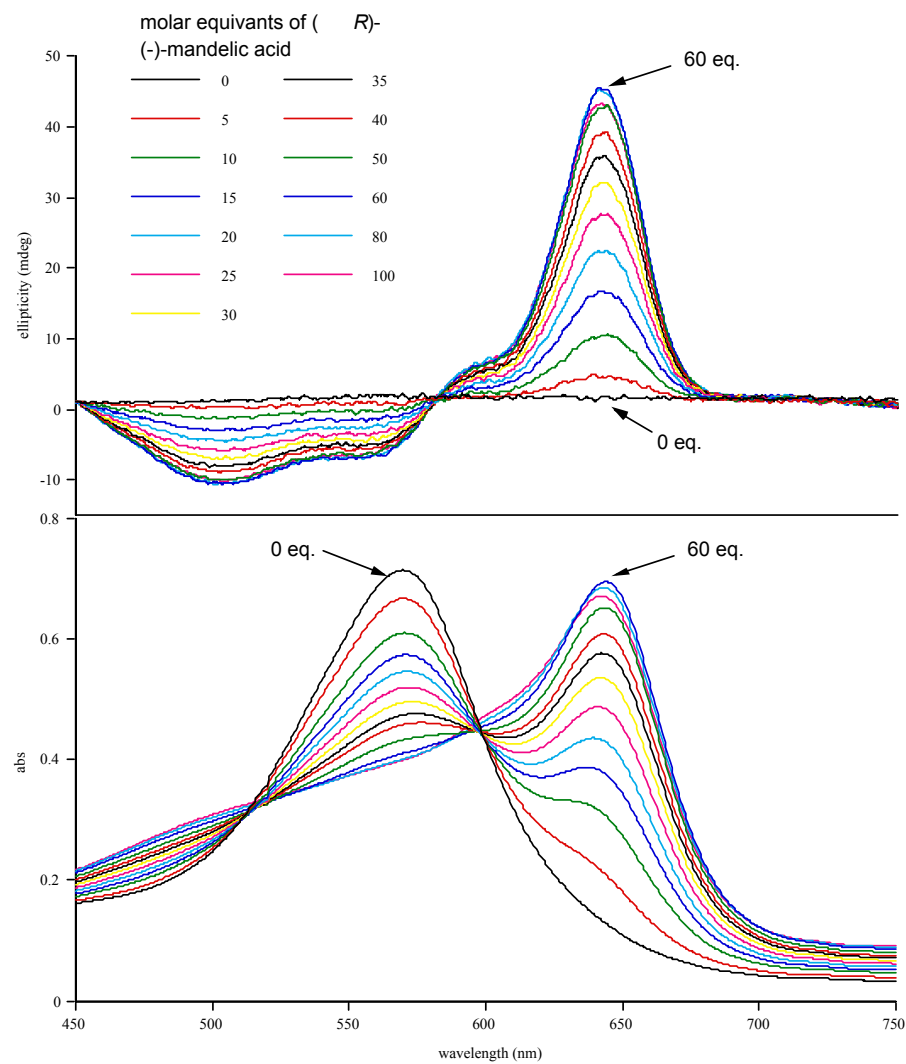

Supplement: b606228h.pdf [file b606228h.pdf]
